# Supplementary material
Source: PubMed Central journal article supplement (PMC6535614)
Supplement: JCM.00213-19-s0001.pdf [file JCM.00213-19-s0001.pdf]

## **Supplementary Appendix**

**Supplementary Table 1.** Calculation of sensitivity, specificity, positive predictive value, and negative predictive value.

**Supplementary Table 2.** Test-positive on the rectal swab and negative on the stool specimen.

**Supplementary Table 3.** Test characteristics of rectal swabs with or without visible feces using stool specimens test results as reference standard.

**Supplementary Table 4.** Multivariable logistic regression analyzing the association between rectal swab feces visibility and overall enteropathogen positivity.

**Supplementary Table 5.** Comparisons of cycle threshold values between rectal swab groups among swab positive Gastroenteritis Virus Panel specimens.

**Supplementary Table 1.** Calculation of sensitivity, specificity, positive predictive value, and negative predictive value of enteropathogen detection by rectal swab, using stool specimen test result as reference standard.

|                          |     | Stool test positive |          | Stool test negative |          |
|--------------------------|-----|---------------------|----------|---------------------|----------|
|                          |     | Rectal swab test    |          | Rectal swab test    |          |
|                          |     | Positive            | Negative | Positive            | Negative |
| Feces visibility on swab | Yes | a1                  | b1       | a2                  | b2       |
|                          | No  | c1                  | d1       | c2                  | d2       |

Calculation of sensitivity of enteropathogen detection by rectal swabs with visible feces:

$$a1/(a1+b1)$$

Calculation of sensitivity of enteropathogen detection by rectal swabs without visible feces:

$$c1/(c1+d1)$$

Calculation of specificity of enteropathogen detection by rectal swabs with visible feces:

$$b2/(a2+b2)$$

Calculation of specificity of enteropathogen detection by rectal swabs without visible feces:

$$d2/(c2+d2)$$

Calculation of positive predicative value of enteropathogen detection by rectal swabs with visible feces:  $a1/(a1+a2)$

Calculation of positive predicative value of enteropathogen detection by rectal swabs without visible feces:  $c1/(c1+c2)$

Calculation of negative predicative value of enteropathogen detection by rectal swabs with visible feces:  $b2/(b1+b2)$

Calculation of negative predicative value of enteropathogen detection by rectal swabs without visible feces:  $d2/(d1+d2)$

**Supplementary Table 2.** Test-positive on the rectal swab and negative on the stool specimen; N=34.

|                                                                             | N (%)          |
|-----------------------------------------------------------------------------|----------------|
| <b>Any Viral Enteropathogen</b>                                             | <b>17 (50)</b> |
| Adenovirus                                                                  | 3 (9)          |
| Astrovirus__                                                                | 1 (3)          |
| Norovirus GI/GII                                                            | 3 (9)          |
| Rotavirus                                                                   | 6 (18)         |
| Sapovirus                                                                   | 4 (12)         |
| <b>Any Bacterial Enteropathogen</b>                                         | <b>17 (50)</b> |
| <i>Campylobacter</i> spp.                                                   | 0 (0)          |
| <i>C. difficile tcdA/B</i>                                                  | 13 (38)        |
| <i>E. coli</i> O157:H7                                                      | 0 (0)          |
| <i>E. coli</i> O26:H11                                                      | 0 (0)          |
| Enterotoxigenic <i>E. coli</i> LT/ST                                        | 0 (0)          |
| <i>Salmonella</i>                                                           | 2 (6)          |
| <i>Shigella</i> – does luminex technically call this <i>Shigella</i> /EIEC? | 1 (3)          |
| <i>stx</i> <sub>1</sub> and/or <i>stx</i> <sub>2</sub>                      | 1 (3)          |
| <i>Vibrio cholerae</i>                                                      | 0 (0)          |
| <i>Yersinia enterocolitica</i>                                              | 0 (0)          |
| <b>Any Parasitic Enteropathogen</b>                                         | <b>0</b>       |
| <i>Cryptosporidium</i>                                                      | 0 (0)          |
| <i>Entamoeba</i>                                                            | 0 (0)          |
| <i>Giardia</i>                                                              | 0 (0)          |

**Supplementary Table 3.** Test characteristics of rectal swabs with or without visible feces using stool specimens test results as reference standard; analyses stratified by clinical features, and restricted to paired specimens obtained within 24 hours of each other.

|                                               | Stool test positive    |                        | Stool test negative    |                        | Testing characteristics of rectal swab in enteropathogen detection* |                          |                   |                   |
|-----------------------------------------------|------------------------|------------------------|------------------------|------------------------|---------------------------------------------------------------------|--------------------------|-------------------|-------------------|
| Feces visibility on swab                      | Swab test positive (N) | Swab test negative (N) | Swab test positive (N) | Swab test negative (N) | Sensitivity (%) (95% CI)                                            | Specificity (%) (95% CI) | PPV (%) (95% CI)  | NPV (%) (95% CI)  |
| <b>Overall</b>                                |                        |                        |                        |                        |                                                                     |                          |                   |                   |
| <b>Yes</b>                                    | 571                    | 36                     | 9                      | 188                    | 94.1 (91.8, 95.8)                                                   | 95.4 (91.2, 97.8)        | 98.5 (97.0, 99.2) | 83.9 (78.3, 88.4) |
| <b>No</b>                                     | 409                    | 75                     | 9                      | 131                    | 84.5 (80.9, 87.6)                                                   | 93.6 (87.8, 96.8)        | 97.9 (95.8, 99.0) | 63.6 (56.8, 70.1) |
| <b>Difference (95%CI)</b>                     |                        |                        |                        |                        | 9.6 (5.8, 13.6)                                                     | 1.9 (-3.5, 8.1)          | 0.6 (-1.2, 2.8)   | 20.3 (11.8, 28.6) |
| <b>Diarrhea present at enrollment</b>         |                        |                        |                        |                        |                                                                     |                          |                   |                   |
| <b>Yes</b>                                    | 454                    | 14                     | 6                      | 120                    | 97.0 (94.9, 98.3)                                                   | 95.2 (89.5, 98.1)        | 98.7 (97.0, 99.5) | 89.6 (82.8, 94.0) |
| <b>No</b>                                     | 324                    | 37                     | 7                      | 75                     | 89.8 (86.4, 92.6)                                                   | 91.5 (82.7, 96.2)        | 97.9 (95.5, 99.1) | 67.0 (57.4, 75.4) |
| <b>Difference (95%CI)</b>                     |                        |                        |                        |                        | 7.3 (3.7, 11.2)                                                     | 3.8 (-3.7, 13.0)         | 0.8 (-1.2, 3.3)   | 22.6 (11.8, 33.2) |
| <b>Isolated Vomiting at enrollment</b>        |                        |                        |                        |                        |                                                                     |                          |                   |                   |
| <b>Yes</b>                                    | 117                    | 22                     | 3                      | 67                     | 84.2 (76.8, 89.6)                                                   | 95.7 (87.2, 98.9)        | 97.5 (92.3, 99.4) | 75.3 (64.8, 83.5) |
| <b>No</b>                                     | 83                     | 38                     | 2                      | 55                     | 68.6 (59.4, 76.6)                                                   | 96.5 (86.8, 99.4)        | 97.7 (91.0, 99.6) | 59.1 (48.5, 69.1) |
| <b>Difference (95%CI)</b>                     |                        |                        |                        |                        | 15.6 (4.7, 26.2)                                                    | -0.8 (-9.8, 9.4)         | -0.2 (-5.7, 6.8)  | 16.1 (1.7, 29.7)  |
| <b>Swab collected in Emergency Department</b> |                        |                        |                        |                        |                                                                     |                          |                   |                   |
| <b>Yes</b>                                    | 362                    | 33                     | 5                      | 139                    | 91.7 (88.3, 94.1)                                                   | 96.5 (91.7, 98.7)        | 98.6 (96.7, 99.5) | 80.8 (74.0, 86.3) |
| <b>No</b>                                     | 316                    | 66                     | 8                      | 110                    | 82.7 (78.5, 86.3)                                                   | 93.2 (86.7, 96.8)        | 97.5 (95.0, 98.9) | 62.5 (54.9, 69.6) |
| <b>Difference (95%CI)</b>                     |                        |                        |                        |                        | 8.9 (4.1, 13.8)                                                     | 3.3 (-2.7, 10.2)         | 1.1 (-1.3, 3.8)   | 18.3 (8.5, 27.7)  |
| <b>Swab collected at home</b>                 |                        |                        |                        |                        |                                                                     |                          |                   |                   |
| <b>Yes</b>                                    | 209                    | 3                      | 4                      | 49                     | 98.6 (95.6, 99.6)                                                   | 92.5 (80.9, 97.6)        | 98.1 (94.9, 99.4) | 94.2 (83.1, 98.5) |

|                           |    |   |   |    |                   |                    |                   |                   |
|---------------------------|----|---|---|----|-------------------|--------------------|-------------------|-------------------|
| <b>No</b>                 | 93 | 9 | 1 | 21 | 91.2 (83.5, 95.6) | 95.5 (75.1, 99.8)  | 98.9 (93.4, 99.9) | 70.0 (50.4, 84.6) |
| <b>Difference (95%CI)</b> |    |   |   |    | 7.4 (2.0, 15.2)   | -3.0 (-15.3, 18.0) | -0.8 (-4.2, 4.9)  | 24.2 (5.9, 44.3)  |

PPV: positive predictive value; NPV: negative predictive value

\*The calculation of sensitivity, specificity, PPV and NPV was using test results based on stool specimens as the gold standard

(Supplementary Table 1).

**Supplementary Table 4.** Multivariable logistic regression analyzing the association between rectal swab feces visibility and overall enteropathogen positivity.

|                               | OR (95% CI)       | P value |
|-------------------------------|-------------------|---------|
| <b>Rectal swab with feces</b> |                   |         |
| Yes                           | reference         |         |
| No                            | 0.85 (0.71, 1.01) | 0.07    |
| <b>Presence of diarrhea</b>   |                   |         |
| Yes                           | reference         |         |
| No                            | 0.34 (0.28, 0.40) | <0.001  |
| <b>Group</b>                  |                   |         |
| Emergency Department          | reference         |         |
| Home                          | 1.79 (1.37, 2.35) | <0.001  |

Interaction between visibility of feces and presence of diarrhea: P=0.49.

Interaction between visibility of feces and location of rectal swab collection: P=0.43.

**Supplementary Table 5.** Comparisons of cycle threshold values between rectal swab groups among swab positive Gastroenteritis Virus Panel specimens.

|               | Rectal swab with visible feces |                       | Rectal swab without visible feces |                       | P value* |
|---------------|--------------------------------|-----------------------|-----------------------------------|-----------------------|----------|
|               | Number of positive swabs       | Ct value median (IQR) | Number of positive swabs          | Ct value median (IQR) |          |
| Adenovirus    | 151                            | 23.5 (18.1, 31.6)     | 120                               | 23.8 (20.6, 28.8)     | 0.22     |
| Astrovirus    | 24                             | 22.6 (19.8, 26.5)     | 28                                | 26.1 (22.5, 28.5)     | 0.08     |
| Norovirus GI  | 10                             | 25.9 (21.8, 28.9)     | 2                                 | 31.3 (26.6, 31.3)#    | 0.35     |
| Norovirus GII | 217                            | 20.5 (18.3, 25.5)     | 158                               | 24.0 (21.4, 28.4)     | <0.001   |
| Rotavirus     | 185                            | 19.4 (16.7, 22.5)     | 152                               | 21.2 (19.2, 25.1)     | <0.001   |
| Sapovirus     | 92                             | 22.5 (18.4, 28.9)     | 64                                | 24.9 (20.7, 29.5)     | 0.09     |

Ct value: cycle threshold value

IQR: interquartile range

\* Mann-Whitney U test

# Median (minimum, maximum)
